# Supplementary material for: An inter- laboratory proficiency testing exercise for rabies diagnosis in Latin America and the Caribbean
Source: PLoS Negl Trop Dis. 2017 Apr 3;11(4):e0005427. doi: 10.1371/journal.pntd.0005427 (PMC5391118; doi:10.1371/journal.pntd.0005427)
Supplement: S2 Table — (XLSX) [file pntd.0005427.s002.xlsx]

## Sheet: Survey_data
For yes/No questions: 0 = NO, 1=YES
NA= Not answered
RowName	q02new	q03	q04	q05	q06	q08	q11	q12	q13	q15new	q19	q20	q21	q22	q25	q26new	q35	q38new	q39new	q45	q47new	q48	q50
	2. How many rabies samples do you test per week?	3. How many people perform the tests in your lab?	4. Has your laboratory a formal quality program?	5. Has a person been appointed to be responsible for the implementation and maintenance of the quality system, with direct access to top level management?	6. Have the laboratory quality policies and objectives been established in writing in a quality manual?	8. Is access to the rabies laboratory restricted to the (rabies) testing personnel?	11. Is the biological safety cabinet systems annually checked and verified?	12. If you have a biological safety cabinet is it restricted for rabies testing?	13. Do you have a fluorescence microscope?	15. About how old is the scope?	19. Are optical surfaces cleaned after every use?	20. Are service and maintenance records available?	21. Does the laboratory have calibration programs for the magnitudes or the essential values of the laboratory instruments?	22. Does your laboratory have an official (institutional) DFA protocol? (You need to attach a copy with your response.	25. Are approval and/or rejection criteria of samples established and written?	26. What areas of the brain are tested routinely?	35. How many anti-rabies conjugates do you use for each test?	38. Do you use rabies negative control FITC labeled conjugate? (Choose all that apply)	39. How long do you incubate the stained slides?	45. How many people read slides per test?	47. If you perform confirmatory testing. Which tests are performed?	48. Do you participate in a proficiency program or rabies?	50. Do you routinely check virus neutralizing antibody (VNA) titer of all employees working in the rabies laboratory?
1	31-50	5	1	1	1	0	1	1	1	0-5 years	1	1	1	1	1	Medulla; cerebellum; hippocampus; pons; spinal cord (if available)	1	Do not use	45 min	2	Repeat DFA with specificity control reagents and anti-bodies conjugates	1	1
2	6 to 10	2	1	1	1	1	1	1	1	0-5 years	1	1	1	1	1	Medulla oblongata (brain stem)	2	Do not use	30 min	1	Repeat DFA with specificity control reagents and anti-bodies conjugates	0	1
3	11 to 20	1	1	1	1	1	1	1	1	16-20 years	1	1	1	0	1	Cerebellum; Hippocampus; Cortex	1	Do not use	60 min	1	Mouse inoculation	0	1
4	21-30	3	1	1	1	1	1	1	1	11-15 years	1	1	1	0	1	Hippocampus; Cerebellum; Cortex; Thalamus	1	Do not use	30 min	1	Mouse inoculation	1	1
5	00-05	4	1	1	1	1	1	1	1	11-15 years	0	1	1	1	0	Medulla; Cerebellum; Hippocampus; Cortex	2	Do not use	30 min	3	NA	1	1
6	11 to 20	3	1	1	1	1	1	0	1	6-10 years	1	1	1	1	0	Medulla oblongata (brain stem)	1	Rat Cerebellum	20 min	2	RT-PCR	0	0
7	11 to 20	3	1	1	1	1	0	1	1	Greater Than 20	1	1	0	1	0	Medulla; Cerebellum; Hippocampus	1	Do not use	30 min	2	RT-PCR	0	0
8	Single Report of 120	7	1	0	1	1	1	1	1	11-15 years	1	1	1	1	0	Hippocampus	1	Do not use	30 min	1	NA	0	1
9	50-100	3	1	1	1	1	1	1	1	6-10 years	1	1	1	1	0	Hippocampus	1	NA	30 min	1	NA	1	1
10	6 to 10	2	1	1	1	1	1	1	1	16-20 years	0	1	1	1	0	Medulla; Cerebellum; Hippocampus; Cortex	1	Do not use	30 min	2	NA	0	1
11	50-100	2	1	1	1	1	1	1	1	0-5 years	0	1	1	1	0	Cerebellum; Hippocampus; Cortex	1	Merck Millipore conjugado monoclonal (control negativo) #5102	40 min	2	NA	1	1
12	00-05	4	0	1	1	0	0	1	1	6-10 years	0	1	0	1	0	NA	1	Do not use	30 min	1	NA	0	0
13	00-05	3	0	1	1	1	0	1	1	Greater Than 20	1	1	0	1	0	Cerebellum; Hippocampus; Cortex	1	Negative Cerebellum Control Sample	30 min	1	NA	0	1
14	6 to 10	5	1	1	1	1	1	1	1	0-5 years	1	1	1	1	0	Medulla oblongata (brain stem)	1	Do not use	30 min	3	NA	0	0
15	00-05	3	0	0	1	1	0	0	1	11-15 years	1	0	0	1	0	NA	1	Do not use	30 min	1	NA	0	0
16	6 to 10	5	1	1	1	1	1	1	1	0-5 years	1	1	1	1	0	NA	1	Do not use	30 min	2	NA	1	1
17	50-100	4	1	1	1	1	1	1	1	0-5 years	0	1	1	1	0	Medulla; Cerebellum; Hippocampus	1	Do not use	30 min	2	Cell Culture	1	1
18	11 to 20	2	1	1	1	1	NA	NA	1	0-5 years	1	1	1	1	0	Cerebellum; Hippocampus; Cortex	1	Do not use	30 min	1	NA	0	0
19	00-05	3	0	1	1	1	0	0	1	0-5 years	1	0	0	1	0	Cerebellum	1	Do not use	30 min	1	NA	0	1
20	00-05	2	1	1	1	1	1	1	1	0-5 years	1	1	1	0	0	Hippocampus	1	Do not use	15 min	2	NA	0	1
21	50-100	4	1	1	1	1	1	1	1	0-5 years	1	1	1	1	0	Cerebellum; Hippocampus; Cortex	1	Do not use	30 min	2	NA	0	1
22	00-05	2	0	0	0	1	0	0	1	11-15 years	1	1	0	1	0	Medulla; Cerebellum; Hippocampus; Cortex	1	Do not use	30 min	2	NA	0	0
23	00-05	1	0	0	0	1	0	0	1	Greater Than 20	1	1	0	0	0	Cerebellum	2	EMD Millipore Light Diagnostics for Monoclonal Conjugate (Negative control) # 5102	30 min	1	NA	1	0
